# Supplementary material for: Recyclable carbon nanotube/silicone oil emulsion with NaOH aqueous solution for indoor CO2 capture
Source: Royal Society of Chemistry journal article supplement (doi:10.1039/d2gc01786e), 2022-01-01
Supplement: d2gc01786e1.pdf [file d2gc01786e1.pdf]

Supporting Information

**Recyclable carbon nanotube/silicone oil emulsion with NaOH aqueous solution for  
indoor CO<sub>2</sub> capture**

*Jae Won Lee, Minjae Kim, Jong Ha Park and Yong Tae Kang\**

**Table S1** Manufacturing conditions of lipophilic reinforcement surface functionalized CNTs.

| Content          | Specifications                                                                                                                                             |
|------------------|------------------------------------------------------------------------------------------------------------------------------------------------------------|
| Nanoparticle     | MWCNT<br>Diameter: 5-20 nm, Length: ~10 μm<br>Aspect ratio: >500<br>Purity: >90 wt%<br>Specific surface area (BET): 130-160 m <sup>2</sup> g <sup>-1</sup> |
| Surfactant       | Trimethoxy(octadecyl)silane (13 wt% to CNT)<br>3-aminopropyltriethoxysilane (2.5 wt% to CNT)<br>Butylamine (2 wt% to CNT)                                  |
| Base fluid       | 2-Propanol                                                                                                                                                 |
| Ultrasonicator   | 20 kHz, 750W, 30 min.                                                                                                                                      |
| Magnetic stirrer | 400 rpm                                                                                                                                                    |
| Centrifuge       | 6000 rpm, 30 min.                                                                                                                                          |
| Vacuum oven      | 80 °C, 24 hrs.                                                                                                                                             |

**Table S2** Manufacturing conditions of the materials.

| Step | Equipment        | Condition                            |
|------|------------------|--------------------------------------|
| 1    | Magnetic stirrer | 200 rpm                              |
|      | Ultrasonicator   | 20 kHz, 750W, 1 h.                   |
| 2    | Magnetic stirrer | 200 rpm                              |
|      | Water bath       | Cooling capacity 880 W, 25 °C, 5 lpm |
| 3    | Magnetic stirrer | 200 rpm                              |
|      | Ultrasonicator   | 20 kHz, 750W, 30 min.                |
|      | Vacuum oven      | -0.5 bar, 80 °C, 2 hrs.              |

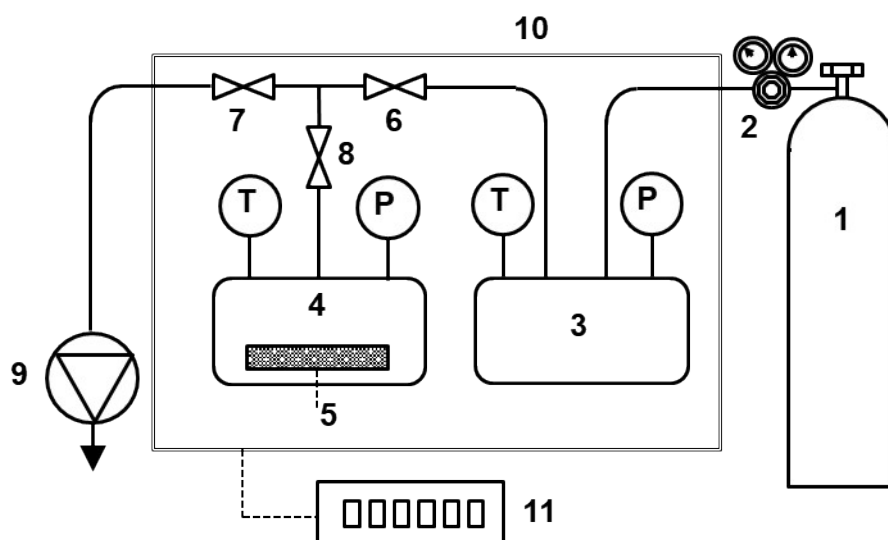

**Fig. S1** Apparatus of the CO<sub>2</sub> capture experiment under pure CO<sub>2</sub> condition; 1: CO<sub>2</sub> gas, 2: Pressure regulator, 3: CO<sub>2</sub> reservoir tank, 4: CO<sub>2</sub> capture chamber, 5: Evaluation sample, 6: Valve-1, 7: Valve-2, 8: Valve-3, 9: Vacuum pump, 10: Thermostat, 11: Data acquisition device

**Table S3** Specifications of the measuring devices.

|             | Type                | Range                                 | Error                   |
|-------------|---------------------|---------------------------------------|-------------------------|
| Temperature | RTD                 | -50 ~ 250 °C                          | ±0.1K                   |
| Pressure    | Pressure transducer | 0 ~ 5 bar                             | ±0.5% of the full scale |
| Volume      | Digital caliper     | 0 ~ 200 mm                            | ±0.01 mm                |
| Weight      | Electricity balance | 0 ~ 2000 g                            | ±2.0 mg                 |
| Vacuum pump | -                   | Open flow: 60 lpm<br>Vacuum: 740 mmHg | -                       |

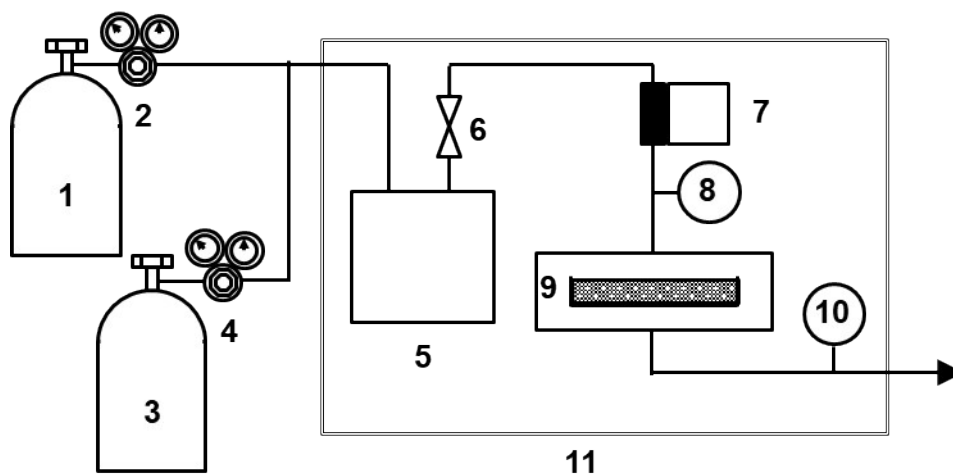

**Fig. S2** Apparatus of the CO<sub>2</sub> capture experiment under low concentration CO<sub>2</sub> condition; 1: CO<sub>2</sub> gas, 2: Pressure regulator, 3: N<sub>2</sub> gas, 4: Pressure regulator, 5: humidity control chamber, 6: flow rate controller, 7: flow rate meter, 8: inlet gas analyzer, 9: Evaluation sample, 10: outlet gas analyzer, 11: Thermostat.

**Table S4** Specifications of the measuring devices.

|                 | Type                | Range       | Error             |
|-----------------|---------------------|-------------|-------------------|
| Temperature     | RTD                 | -50-250 °C  | ±0.1K             |
| Humidity        | Humidity transducer | 0.1-99.9%   | ±0.1%             |
| Flow rate       | Mass flow rate      | 0 ~ 10 lpm  | ±1% of full scale |
| CO <sub>2</sub> | Gas analyzer        | 0-10000 ppm | ±50 ppm           |
| Weight          | Electricity balance | 0-2000 g    | ±2.0 mg           |

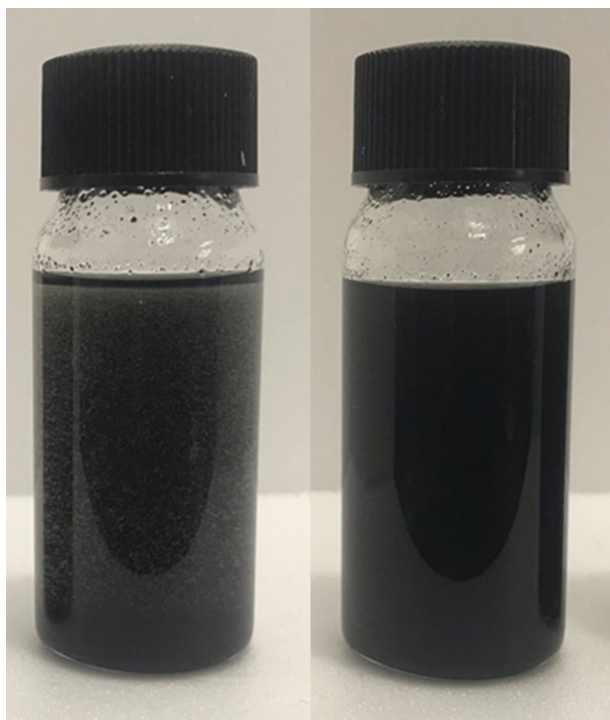

**Fig. S3** Visualization of the dispersion in silicone oil according to the CNT type (left: pristine CNT and right: lipophilically reinforced CNT).

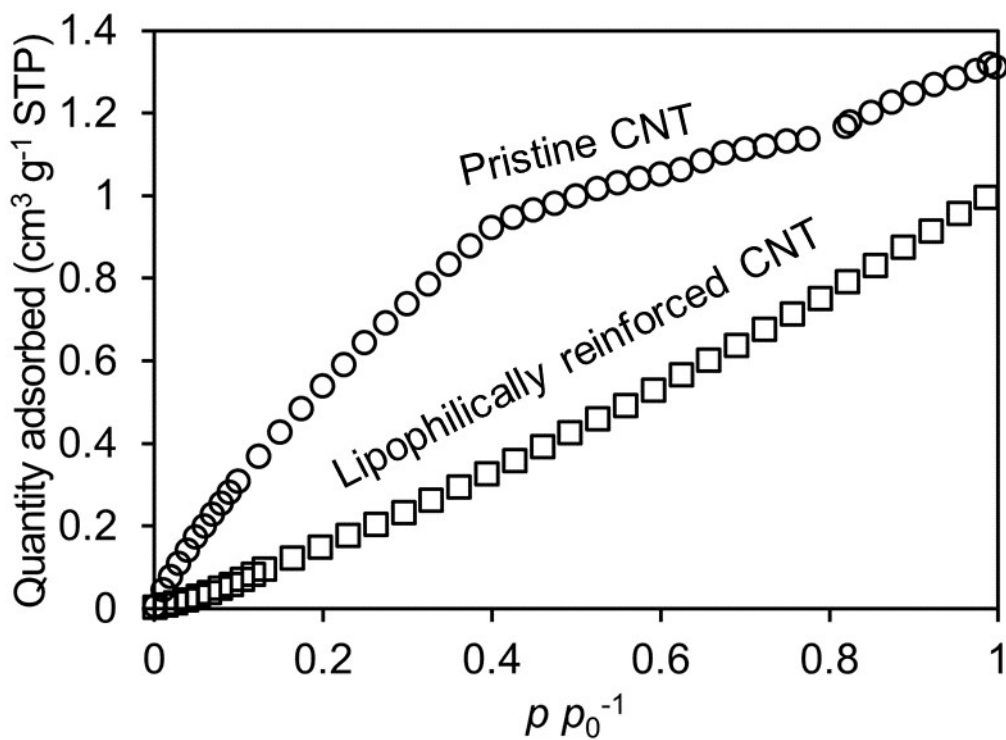

**Fig. S4** CO<sub>2</sub> adsorption capacity according to the CNT type.

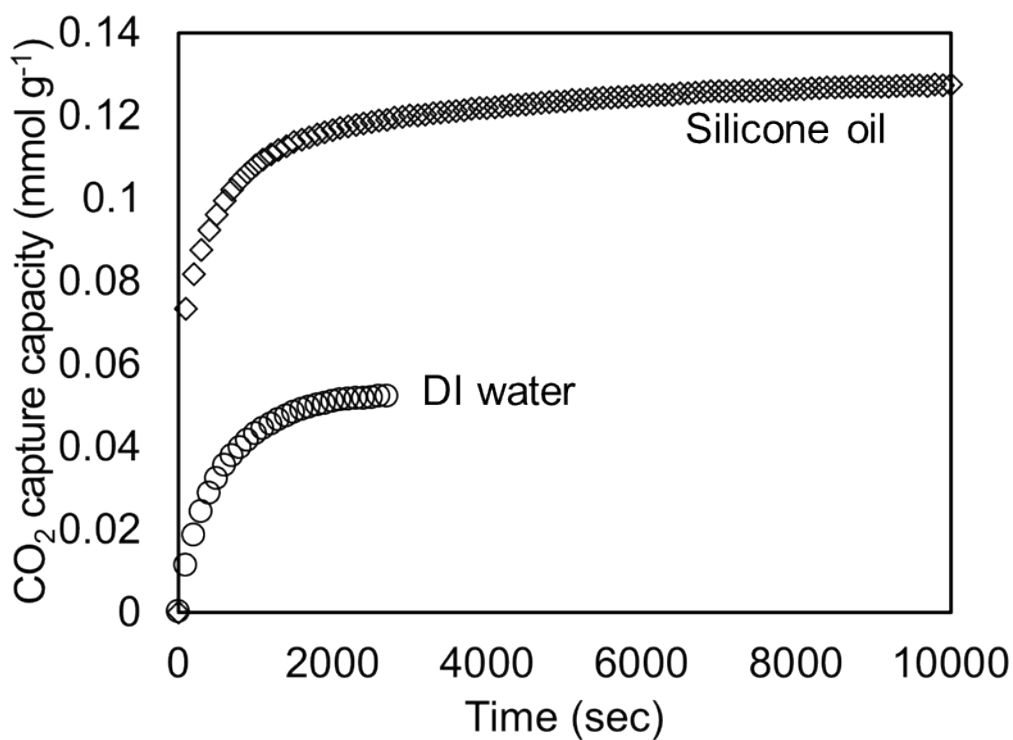

**Fig. S5** CO<sub>2</sub> capture capacity of the silicone oil and the DI water.

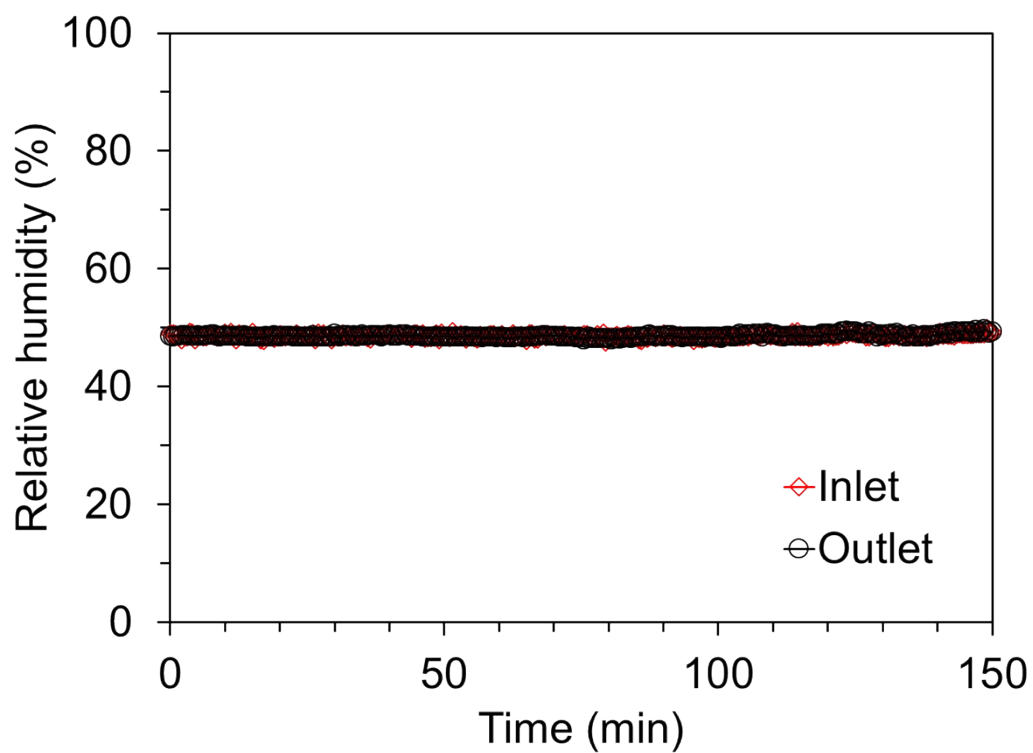

**Fig. S6** Relative humidity variation at the inlet and outlet at 50% RH.

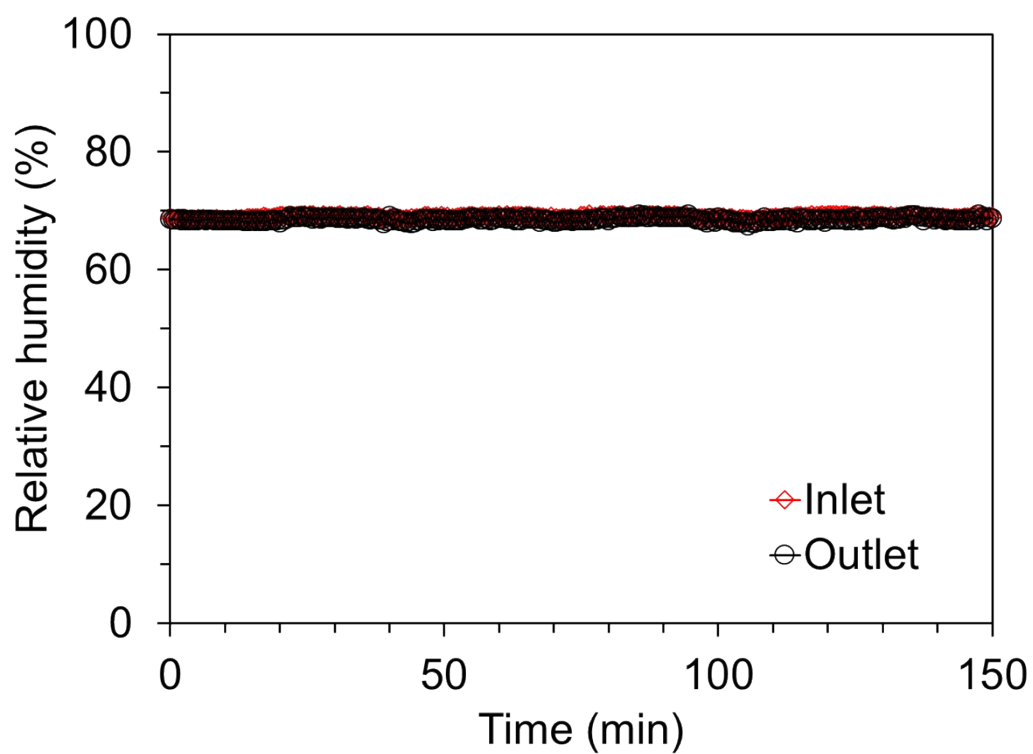

**Fig. S7** Relative humidity variation at the inlet and outlet at 70% RH.

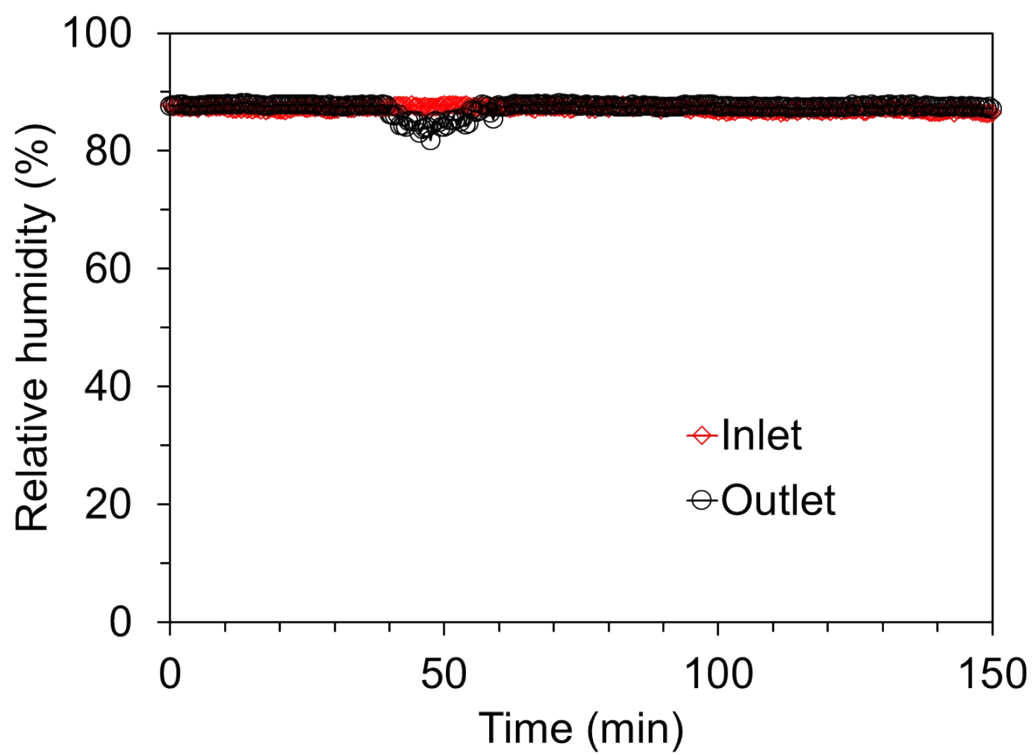

**Fig. S8** Relative humidity variation at the inlet and outlet at 90% RH.



**Table S5** Net material cost and ratio to fabricate 1 ton of ES-NaOH (CNT: 0.075 wt%).

|             | Material                       | Price [USD <sup>a)</sup> ] | Ratio [%] |       |
|-------------|--------------------------------|----------------------------|-----------|-------|
| Oil phase   | MWCNT (0.075 wt%)              | 2,271                      | 22.0      | 100.0 |
|             | 2-propanol                     | 3,253                      | 31.5      |       |
|             | Trimethoxy (octadecyl) silane  | 630                        | 6.1       |       |
|             | (3-Aminopropyl)triethoxysilane | 20                         | 0.2       |       |
|             | Butylamine                     | 3                          | 0.0       |       |
|             | Silicone oil                   | 41,445                     | 40.1      |       |
| Water phase | NaOH (30 wt%)                  | 4                          | 0.0       | 0.0   |

<sup>a)</sup> 1 USD (United States dollar) = 1,100 KRW (Korean Won)
